# Supplementary material for: Comparative Analysis of the Nodule Transcriptomes of Ceanothus thyrsiflorus (Rhamnaceae, Rosales) and Datisca glomerata (Datiscaceae, Cucurbitales)
Source: Front Plant Sci. 2018 Nov 14;9:1629. doi: 10.3389/fpls.2018.01629 (PMC6246699; doi:10.3389/fpls.2018.01629)
Supplement: Table S5 — List of genes analysed by RT-qPCR. Gene names, protein functions, number of contig in assembly, GenBank accession number and, if available, E.C. number are given. [file Table_5.xlsx]

## Sheet: Ceanothus thyrsiflorus
contig in assembly	gene name	protein function	GenBank accession	EC number	Remarks
c24602_g1	CtEF1A	elongation factor 1-alpha	MH734126		5’-truncated
c26717_g1	CtNFR1	LysM receptor kinase	MH734127
c37549_g1	CtNFR5	LysM receptor	MH734128
c39118_g2	CtEPR3	LysM receptor kinase	MH734129
c19475_g1	CtFLOT	flotillin	MH734130
c27874_g1	CtVPY	vapyrin	MH734131
c38065_g1	CtLIN	U-box/WD40 protein	MH734132
c30458_g1	CtGS1	glutamine synthetase, cytosolic	MH734133	6.3.1.2
c32191_g1	CtASN1	asparagine synthetase	MH996641	6.3.5.4
c38184_g1	CtGOGAT	NADPH-dependent glutamate synthase, plastidic	MH734134	1.4.1.13
c35344_g1	CtNIR	nitrite reductase	MH734135	1.7.1.4
c8699_g1	CtP5CS	bifunctional glutamate-5-semialdehyde dehydrogenase and delta-1-pyrolline-5-carboxylate synthase	MH734136	2.7.2.11, 1.2.1.41
c36839_g1	CtOAT	ornithine aminotransferase	MH734137	2.6.1.13	5’-truncated
c35880_g1	CtCPS-SSU	carbamoyl-phosphate synthase, gln-dependent, small subunit, plastidic	MH734138	6.3.5.5
c31877_g1	CtARLY	argininosuccinate lyase, plastidic	MH734140	4.3.2.1
c37782_g1	CtASSY	arginosuccinate synthase, plastidic	MH734139	6.3.4.5
c31424_g1	CtARGH1	arginase, mitochondrial	MH734141	3.5.3.1
c37501_g1	CtDUR3	high affinity plasma membrane urea transporter	MH924018
c37737_g2	CtNAOAT	N-acetylornithine aminotransferase, mitochondrial	MH924019	2.6.1.11
c36428_g1	CtARGJ	arginine biosynthesis bifunctional protein ArgJ, plastidic	MH734142	2.3.1.35, 2.3.1.1
c24096_g1	CtTHIC	4-amino-5-hydroxymethyl-2-methylpyrimidinephosphate synthase	MH734143	4.1.99.17
c34246_g1	CtTHI4	bifunctional enzyme hydroxyethylthiazole kinase and thiamine-phosphate pyrophosphorylase	MH734144	2.5.1.3, 2.7.1.50
c39174_g2	CtNUDT1	nudix hydrolase	MH924020	3.6.1.-
c35711_g2	CtADCL	4-amino deoxychorismate lyase, plastidic	MH924021	2.6.1.85
c4055_g1	CttrHb1	2-on-2 hemoglobin, truncated haemoglobin, bacterial globin	MH734145
c17120_g1	CtHb1	class I haemoglobin	MH924022
c33510_g1	CtSODC	copper/zinc superoxide dismutase	MH734146	1.15.1.1
c19409_g1	CtSODM	iron/manganese superoxide dismutase	MH734147	1.15.1.1
c19257_g1	CtPER42	peroxidase 42 based on Arabidopsis thaliana gene family	MH734148	1.11.1.7
c29022_g1	CtCAT	catalase	MH734149	1.11.1.6
c4825_g1	CtAPX1	cytosolic asccorbate peroxidase 1	MH734150	1.11.1.11
c23716_g1	CtDHAR1	dehydroascorbate reductase 1	MH734151	1.8.5.1
c33792_g1	CtMDAR	monodehydroascorbate reductase	MH734152	1.6.5.4
c11945_g1	CtGPX4	glutathione peroxidase	MH734153	1.11.1.9
c25417_g1	CtGPX8	glutathione peroxidase	MH734154	1.11.1.9
c24098_g1	CtGPX6	glutathione peroxidase	MH734155	1.11.1.9
c31503_g1	CtRbcS	ribulose-1,5-bisphophate carboxylase (rubisco), small subunit, plastidic	MH734156	4.1.1.39
c78883_g1	CtRbcL	ribulose-1,5-bisphophate carboxylase (rubisco), large subunit, plastidic, plastid-encoded	MH734157	4.1.1.39
c35348_g1	Ct12	subtilisin	MH734158	3.4.21.62
c29196_g1	CtCUCM1-1	cucumisin	MH734159	3.4.21.25
c34419_g1	CtCUCM1-2	cucumisin	MH734160	3.4.21.25
c91758_g1	CtDEF1	defensin	MH734161
c90907_g1	CtDEF2	defensin	MH734162

## Sheet: Datisca glomerata
contig in assembly	gene name	protein function	GenBank accession	EC number	Remarks
c47008_g1	DgEF1A	elongation factor 1-alpha	MH900481		5'-truncated
c41833_g7	DgNFR1	LysM receptor kinase	MH900482		3'-truncated
c21743_g1	DgNFR5	LysM receptor	MH900483
c31956_g1	DgEPR3	LysM receptor kinase	MH900484		full size sequence comes from an unpublished assembly
c43210_g3	DgFLOT	flotillin	MH900485
c78522_g1	DgVPY	vapyrin	AGG82491.1
c16311_g1	DgGS1-1	glutamine synthetase, cytosolic	AY422224.1	6.3.1.2
c36933_g1	DgGOGAT	NADPH-dependent glutamate synthase, plastidic	MH900486	1.4.1.13
c11724_g1	DgNIR	nitrite reductase, plastidic	MH900487	1.7.1.4	5'-truncated
c41858_g1	DgASN1	asparagine synthase (glutamine-hydrolyzing)	MH900488	6.3.5.4
c38804_g2	DgP5CS	bifunctional glutamate-5-semialdehyde dehydrogenase and delta-1-pyrolline-5-carboxylate synthase	MH900489	2.7.2.11, 1.2.1.41	5'-truncated
c31190_g1	DgCPS-SSU	carbamoyl-phosphate synthase, gln-dependent, small subunit, plastidic	MH900490	6.3.5.5
c29417_g1	DgASSY	argininosuccinate synthase, plastidic	MH900491	6.3.4.5
c39485_g1	DgARLY	argininosuccinate lyase, plastidic	MH900492	4.3.2.1
c35449_g1	DgARGH1	arginase, mitochondrial	MH900493	3.5.3.1
c26239_g1	DgNAOAT	N-acetylornithine aminotransferase	MH900494	2.6.1.11
c41827_g3	DgOAT	ornithine aminotransferase	MH996640	2.6.1.13
c37525_g2	DgARGJ	arginine biosynthesis bifunctional protein ArgJ, plastidic	MH900495	2.3.1.35, 2.3.1.1
c38233_g2	DgTHIC	ThiC, 4-amino-5-hydroxymethyl-2-methylpyrimidinephosphate synthase, plastidic	MH900496	4.1.99.17
c53044_g1	DgTHI4	Thi4, bifunctional enzyme hydroxyethylthiazole kinase and thiamine-phosphate pyrophosphorylase	MH900497	2.5.1.3, 2.7.1.50
c24829_g1	DgNUDT1	nudix hydrolase	MH924017	3.6.1.-
c69623_g1	DgADCL	4-amino deoxychorismate lyase, plastidic	MH900498	2.6.1.85
c29874_g1	DgtrHb1	2-on-2 hemoglobin, truncated haemoglobin, bacterial globin	AJ489324.1
c28519_g1	DgHb1-1	class I haemoglobin	MH900499
c35069_g1	DgHb1-2	class I haemoglobin	MH900500
c44623_g1	DgSODC	copper/zinc superoxide dismutase	MH900501	1.15.1.1
c33755_g2	DgSODM	manganese superoxide dismutase, mitochondrial	HQ005274.1	1.15.1.1
c86876_g1	DgPER60	peroxidase	MH900502	1.11.1.7
c15041_g1	DgPER42	peroxidase	MH900503	1.11.1.7
c22936_g1	DgAPX1	cytosolic asccorbate peroxidase 1	MH900504	1.11.1.11	5'-truncated
c3666_g1	DgAPX2	cytosolic asccorbate peroxidase 2	MH900505	1.11.1.11
c28693_g1	DgDHAR2	dehydroascorbate reductase 2	MH900506	1.8.5.1
c78212_g1	DgGSTXC	glutathione S-transferase	MH900507	2.5.1.18
c69924_g1	DgGPX4	glutathione peroxidase	MH900508	1.11.1.9
c70007_g1	DgGSTUH	glutathione S-transferase	MH900509	2.5.1.18
c61839_g1	DgMDAR	monodehydroascorbate reductase	MH900510	1.6.5.4
c22224_g1	DgRbcS	ribulose-1,5-bisphosphate carboxylase (rubisco), small chain, plastidic	MH900511	4.1.1.39
c78170_g2	DgRbcL	ribulose-1,5-bisphosphate carboxylase (rubisco), large chain, plastidic, plastid-encoded	MH900512	4.1.1.39
c69584_g1	DgCUCM1	cucumisin	MH900513	3.4.21.25
c61424_g1	Dg12	subtilisin	MH900514	3.4.21.62
